# Supplementary material
Source: PubMed Central journal article supplement (PMC3264428)
Supplement: NIHMS347031-supplement-S1.pdf [file NIHMS347031-supplement-S1.pdf]

## Supporting Online Material for

### **A natural deletion of the *HoxC* cluster in elasmobranch fishes**

Benjamin L. King\*, J. Andrew Gillis, Heather R. Carlisle and Randall D. Dahn

\*To whom correspondence should be addressed. E-mail: [bking@mdibl.org](mailto:bking@mdibl.org)

#### **This PDF file includes:**

Materials and Methods

Fig. S1

Tables S1 to S2

## Materials and Methods

### *Isolation of DNA and RNA*

Genomic DNA was extracted from a single *L. erinacea* Stage 32 embryo (Marine Biological Laboratory, Woods Hole, MA) by C. Mattingly using the Gentra Puregene kit (Qiagen). Total RNA was extracted using Tri Reagent (Ambion) from the following pooled tissue samples: six *L. erinacea* Stage 20-29 embryos (Marine Biological Laboratory, Woods Hole, MA), six *S. canicula* Stage 24-30 (Blue Reef Aquarium, Hastings, UK), and two *C. milii* stage 32 embryos (collected by J. A. G.).

### *DNA and RNA Sequencing*

A 500bp paired-end genomic DNA library was constructed using standard Illumina protocols. 806,309,979 125 bp paired-end sequence reads were generated on an Illumina Genome Analyzer Iix (Delaware Biotechnology Institute, University of Delaware) using eleven flow cells. Embryonic RNA libraries for *L. erinacea*, *S. canicula* and *C. milii* were generated using standard Illumina protocols for single-end sequencing. 49,509,611, 50,760,902 and 43,835,550 76 bp sequencing reads were generated for *L. erinacea*, *S. canicula* and *C. milii*, respectively, on an Illumina Genome Analyzer II (Centre for Applied Genomics, Hospital for Sick Children, Toronto, Canada) using two flow cell lanes. Base calling was determined using Illumina pipeline software according to manufacturer's specification (Illumina).

### *Genome and Transcriptome Assemblies*

Genome and transcriptome assemblies were made using CLCBio Genome Workbench version 4 (<http://www.clcbio.com>). The transcriptome assemblies generated 103,996 (N50 = 757 bp), 107,231 (N50 = 695 bp) and 92,334 (N50 = 576 bp) contiguous sequences for *L. erinacea*, *S. canicula* and *C. milii*, respectively. 49,10,973, 50,748,002 and 43,813,111 trimmed reads were used in the assemblies for *L. erinacea*, *S. canicula* and *C. milii*, respectively. There were 11,927,042, 14,836,404 and 16,660,753 singletons for *L. erinacea*, *S. canicula* and *C. milii*, respectively. The *L. erinacea* genome assembly used 727,225,088 trimmed reads and had 2,962,365 contigs (N50 = 665 bp) with an overall length of 1,555,444,314 bp and 52,104,024 singletons.

### *Gene Annotation*

*Hox* coding sequences and microRNAs were predicted using reciprocal sequence similarity searches. Nucleotide and protein sequences for each *C. milii* *Hox* gene were aligned against assembled genomic and transcriptomic DNA sequences for each species using Decypher Tera-BLASTN and Tera-BLASTP searches, respectively (TimeLogic Decypher BLAST version 8.0.1). Sequences aligning to particular *C. milii* *Hox* sequences were validated via reciprocal blastn and blastx searches (NCBI BLAST) against sequences in GenBank and non-redundant protein databases. *C. milii*-human conserved sequence elements were found using NCBI BLAST version 2.2.23+.

### *Statistical Analyses*

Analysis of gene expression levels by read coverage was done using the Kruskal-Wallis test using values in Table S1 to determine whether the distribution of read coverage was similar among *HoxA*, *HoxB*, *HoxC* and *HoxD* genes for each species. For genes represented by reads instead of contigs, a cumulative length of 125 bp and an average coverage of zero were used in the calculation of the average cumulative length and coverage. Analysis of *L. erinacea* genome read coverage (Table S1) for *Hox* genes was performed using the Wilcoxon rank-sum test to determine whether the read coverage among *HoxA*, *HoxB* and *HoxD* genes was significantly greater than the coverage for *HoxC*. Analysis of the presence and absence of *C. mili*-human CSEs (Table S2) were calculated using Fisher's Exact Test using a contingency table where the proportion of detected *HoxC* elements (zero to 25) is compared to the proportion for *HoxA*, *HoxB* and *HoxD* elements (126 to 249). Analyses were performed in the R statistical computing environment (<http://www.r-project.org>), version 2.13.1, using the R/coin package, version 1.0-19.

**Supplemental Figure 1:** *HoxC*-encoded microRNAs are not present in the skate genome. (a) The genome of *C. milii* encodes three miRNAs each of the *Hox*-specific miR-10 and miR-196 families. A 26-fold coverage draft of the skate genome reveals the presence of only four miRNAs: *pre-miR-196b* physically linked to the *HoxA10* gene, *pre-miR-196a-1* and *pre-miR-10a* linked to the *HoxB10* and *HoxB5* genes, respectively, and *pre-miR-10b* linked to the *HoxD4* gene. No sequences encoding the *HoxC*-embedded *pre-miR-10c* or *pre-miR-196a-2* genes were detected ( $p = 6.51 \times 10^{-7}$  by the Wilcoxon Rank Sum Test). (b) An unrooted phylogram of all *Hox*-specific miRNA sequences in the genomes of *C. milii* and *L. erinacea* confirms that the *HoxC*-specific *miR-10c* and *miR-196a-2* genes are absent in the skate, further supporting the notion that the *HoxC* cluster has been deleted in elasmobranch fishes. *C. milii* miRNAs are prefaced by 'Cm,' and *L. erinacea* miRNAs by 'Le'. *C. milii* miRNAs which have no ortholog in *L. erinacea* are indicated by red text.

Fig. S1

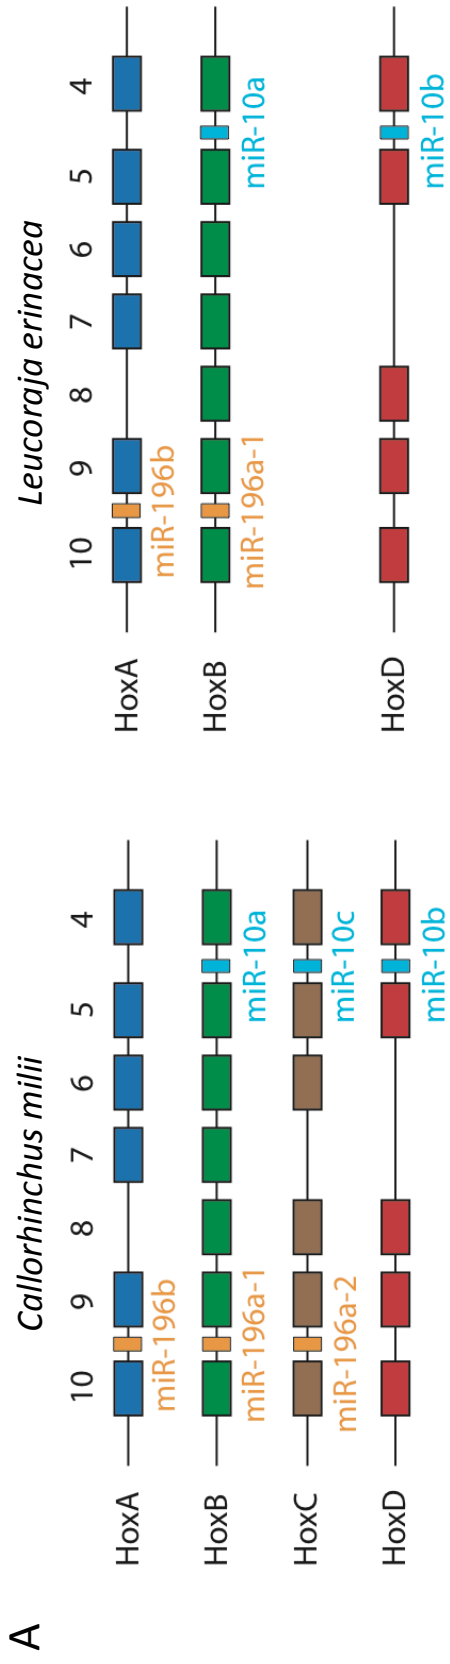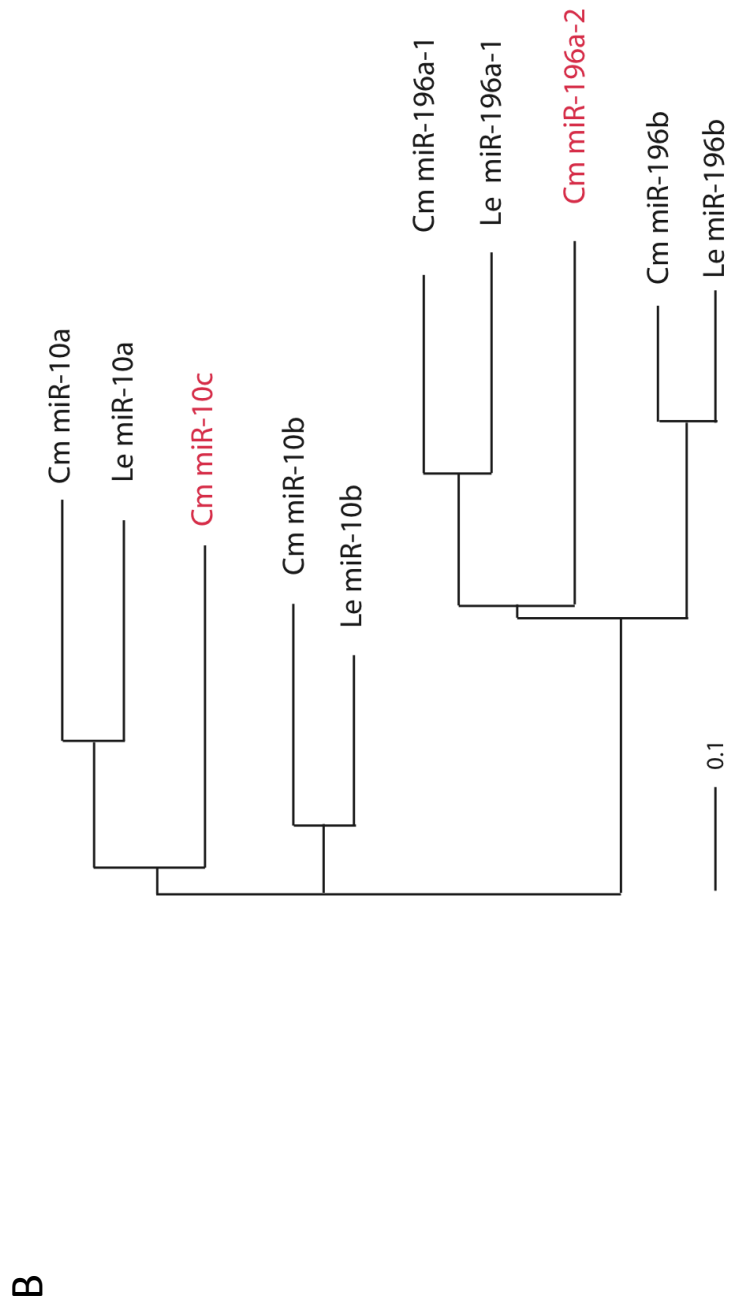

**Table S1:** Transcriptome representation of *HoxA*, *B*, *C* and *D* clusters for *C. milii*, *L. erinacea* and *S. canicula* and genome representation of *HoxA*, *B*, *C* and *D* clusters for *L. erinacea*. For each *Hox* gene, the protein length, cumulative length of contigs, number of reads that map to the contigs and the average coverage is listed. Unique identifiers are listed for *L. erinacea* genomic contigs. The *L. erinacea* genomic contigs for pre-miR-196b, pre-miR-196a-1, miR-10a and miR-10b were LER\_WGS\_1\_CONTIG\_2688791, LER\_WGS\_1\_CONTIG\_88050, LER\_WGS\_1\_CONTIG\_46923 and LER\_WGS\_1\_CONTIG\_2672030, respectively. Singlet only = no contig coverage; single read sequence coverage only. N/A = not applicable; no coverage found.

Supplemental Table 1

| GENE   | <i>C. milii</i> |                               |                  |                  | <i>L. erinacea (St28)</i>     |                  |                  |                               | <i>S. canicula</i> |                  |                               |                  | <i>L. erinacea Genomic</i> |                               |                  |                  |
|--------|-----------------|-------------------------------|------------------|------------------|-------------------------------|------------------|------------------|-------------------------------|--------------------|------------------|-------------------------------|------------------|----------------------------|-------------------------------|------------------|------------------|
|        | LENGTH (aa)     | CUMULATIVE CONTIG LENGTH (bp) | TOTAL READ COUNT | AVERAGE COVERAGE | CUMULATIVE CONTIG LENGTH (bp) | TOTAL READ COUNT | AVERAGE COVERAGE | CUMULATIVE CONTIG LENGTH (bp) | TOTAL READ COUNT   | AVERAGE COVERAGE | CUMULATIVE CONTIG LENGTH (bp) | TOTAL READ COUNT | AVERAGE COVERAGE           | CUMULATIVE CONTIG LENGTH (bp) | TOTAL READ COUNT | AVERAGE COVERAGE |
| HOXA1  | 326             | 254                           | 16               | 4.79             | Singlet only                  | Singlet only     | < 1              | Singlet only                  | Singlet only       | < 1              | Singlet only                  | 583              | 30.79                      | 3360                          | 856              | 31.85            |
| HOXA2  | 363             | 1492                          | 909              | 46.30            | 1358                          | 632              | 35.37            | 1439                          | 583                | 1439             | 583                           | 30.79            | 5627                       | 1080                          | 23.99            |                  |
| HOXA3  | 409             | 1782                          | 1102             | 47.00            | 1922                          | 1733             | 68.53            | 2684                          | 705                | 19.96            | 705                           | 19.96            | 6685                       | 1331                          | 24.89            |                  |
| HOXA4  | 247             | 1624                          | 572              | 26.77            | 1991                          | 686              | 26.19            | 413                           | 80                 | 14.72            | 80                            | 14.72            | 4271                       | 845                           | 24.73            |                  |
| HOXA5  | 281             | 1546                          | 350              | 17.21            | 2378                          | 802              | 25.63            | 1186                          | 311                | 19.93            | 311                           | 19.93            | 10013                      | 2074                          | 25.89            |                  |
| HOXA6  | 229             | 203                           | 13               | 4.87             | 1270                          | 163              | 9.75             | 610                           | 70                 | 8.72             | 70                            | 8.72             | 5783                       | 1191                          | 25.74            |                  |
| HOXA7  | 252             | 1044                          | 34               | 11.69            | 867                           | 308              | 27.00            | 530                           | 64                 | 9.18             | 64                            | 9.18             | 7092                       | 1476                          | 22.80            |                  |
| HOXA9  | 259             | 1973                          | 1262             | 48.61            | 1515                          | 789              | 39.58            | 1850                          | 677                | 27.81            | 789                           | 27.81            | 8964                       | 1414                          | 19.72            |                  |
| HOXA10 | 293             | 2309                          | 1046             | 34.43            | 2696                          | 1397             | 39.38            | 816                           | 1362               | 126.85           | 1362                          | 126.85           | 7551                       | 1503                          | 24.88            |                  |
| HOXA11 | 296             | 1221                          | 525              | 32.68            | 1076                          | 275              | 19.42            | 1021                          | 132                | 9.83             | 132                           | 9.83             | 8650                       | 1587                          | 22.93            |                  |
| HOXB1  | 318             | 270                           | 17               | 4.79             | Singlet only                  | Singlet only     | < 1              | Singlet only                  | Singlet only       | < 1              | Singlet only                  | Singlet only     | 4178                       | 863                           | 25.82            |                  |
| HOXB2  | 362             | 1640                          | 488              | 22.61            | 1089                          | 477              | 33.29            | 1000                          | 393                | 29.87            | 393                           | 29.87            | 2117                       | 368                           | 21.73            |                  |
| HOXB3  | 394             | 1743                          | 1205             | 52.54            | 1544                          | 823              | 40.51            | 1520                          | 838                | 41.90            | 838                           | 41.90            | 2466                       | 449                           | 22.76            |                  |
| HOXB4  | 243             | 606                           | 134              | 16.81            | 535                           | 72               | 10.23            | 1728                          | 272                | 11.96            | 272                           | 11.96            | 4238                       | 807                           | 23.80            |                  |
| HOXB5  | 260             | 847                           | 183              | 16.42            | 1037                          | 286              | 20.96            | 1021                          | 251                | 18.68            | 251                           | 18.68            | 1944                       | 353                           | 22.70            |                  |
| HOXB6  | 230             | 1070                          | 218              | 15.48            | 1431                          | 330              | 17.53            | 435                           | 40                 | 6.99             | 40                            | 6.99             | 4828                       | 925                           | 23.95            |                  |
| HOXB7  | 211             | 856                           | 377              | 33.47            | 1307                          | 712              | 41.40            | 1096                          | 452                | 31.34            | 452                           | 31.34            | 2969                       | 564                           | 23.75            |                  |
| HOXB8  | 236             | 1058                          | 425              | 30.53            | 1619                          | 785              | 36.85            | 1545                          | 409                | 20.12            | 409                           | 20.12            | 1594                       | 332                           | 26.04            |                  |
| HOXB9  | 250             | 715                           | 218              | 23.17            | 1160                          | 304              | 19.92            | 1294                          | 356                | 20.91            | 356                           | 20.91            | 8019                       | 1888                          | 29.43            |                  |
| HOXB10 | 337             | 2737                          | 1605             | 44.57            | 1134                          | 386              | 25.87            | 1381                          | 306                | 16.84            | 306                           | 16.84            | 1710                       | 329                           | 24.05            |                  |
| HOXB11 | 308             | 1546                          | 2000             | 98.32            | 767                           | 211              | 20.91            | 1413                          | 271                | 14.58            | 271                           | 14.58            | 1544                       | 323                           | 26.15            |                  |
| HOXC1  | 291             | Singlet only                  | 7                | < 1              | N/A                           | N/A              | 0.00             | N/A                           | N/A                | 0.00             | N/A                           | 0.00             | N/A                        | N/A                           | 0.00             |                  |
| HOXC3  | 408             | 1330                          | 186              | 10.63            | N/A                           | N/A              | 0.00             | N/A                           | N/A                | 0.00             | N/A                           | 0.00             | N/A                        | N/A                           | 0.00             |                  |
| HOXC4  | 256             | 606                           | 92               | 11.54            | N/A                           | N/A              | 0.00             | N/A                           | N/A                | 0.00             | N/A                           | 0.00             | N/A                        | N/A                           | 0.00             |                  |
| HOXC5  | 231             | 1662                          | 452              | 20.67            | N/A                           | N/A              | 0.00             | N/A                           | N/A                | 0.00             | N/A                           | 0.00             | N/A                        | N/A                           | 0.00             |                  |
| HOXC6  | 219             | 1162                          | 213              | 13.93            | N/A                           | N/A              | 0.00             | N/A                           | N/A                | 0.00             | N/A                           | 0.00             | N/A                        | N/A                           | 0.00             |                  |
| HOXC8  | 244             | 1270                          | 228              | 13.64            | N/A                           | N/A              | 0.00             | N/A                           | N/A                | 0.00             | N/A                           | 0.00             | N/A                        | N/A                           | 0.00             |                  |
| HOXC9  | 262             | 1149                          | 204              | 13.49            | N/A                           | N/A              | 0.00             | N/A                           | N/A                | 0.00             | N/A                           | 0.00             | N/A                        | N/A                           | 0.00             |                  |
| HOXC10 | 357             | 1312                          | 187              | 10.83            | N/A                           | N/A              | 0.00             | N/A                           | N/A                | 0.00             | N/A                           | 0.00             | N/A                        | N/A                           | 0.00             |                  |
| HOXC11 | 300             | 743                           | 119              | 12.17            | N/A                           | N/A              | 0.00             | N/A                           | N/A                | 0.00             | N/A                           | 0.00             | N/A                        | N/A                           | 0.00             |                  |
| HOXC12 | 270             | 1108                          | 684              | 46.92            | N/A                           | N/A              | 0.00             | N/A                           | N/A                | 0.00             | N/A                           | 0.00             | N/A                        | N/A                           | 0.00             |                  |
| HOXC13 | 318             | 1397                          | 975              | 53.04            | N/A                           | N/A              | 0.00             | N/A                           | N/A                | 0.00             | N/A                           | 0.00             | N/A                        | N/A                           | 0.00             |                  |
| HOXD1  | 315             | 1445                          | 410              | 21.56            | 948                           | 58               | 4.65             | 798                           | 73                 | 6.95             | 73                            | 6.95             | 2997                       | 824                           | 34.37            |                  |
| HOXD2  | 356             | 1379                          | 475              | 26.18            | 1217                          | 112              | 6.99             | 1267                          | 253                | 15.18            | 253                           | 15.18            | 2877                       | 578                           | 25.11            |                  |
| HOXD3  | 394             | 1603                          | 628              | 29.77            | 1764                          | 657              | 28.31            | 3562                          | 1879               | 40.09            | 1879                          | 40.09            | 5501                       | 1006                          | 22.86            |                  |
| HOXD4  | 238             | 1131                          | 442              | 29.70            | 1952                          | 924              | 35.98            | 1866                          | 468                | 19.06            | 468                           | 19.06            | 8294                       | 1767                          | 26.63            |                  |
| HOXD5  | 249             | 1264                          | 229              | 13.77            | 1259                          | 617              | 37.25            | 802                           | 212                | 20.09            | 212                           | 20.09            | 3566                       | 692                           | 24.26            |                  |
| HOXD8  | 239             | 1174                          | 174              | 11.26            | 1414                          | 160              | 22.04            | 1427                          | 160                | 14.27            | 160                           | 14.27            | 4177                       | 836                           | 25.02            |                  |
| HOXD9  | 265             | 1768                          | 696              | 29.92            | 1332                          | 412              | 33.92            | 1216                          | 341                | 21.31            | 341                           | 21.31            | 2314                       | 525                           | 28.36            |                  |
| HOXD10 | 338             | 1317                          | 975              | 53.04            | 1306                          | 426              | 24.79            | 2324                          | 479                | 15.66            | 479                           | 15.66            | 7975                       | 1473                          | 23.09            |                  |
| HOXD11 | 296             | 1159                          | 222              | 14.56            | 1460                          | 163              | 8.48             | 1177                          | 83                 | 5.36             | 83                            | 5.36             | 12189                      | 2410                          | 24.71            |                  |
| HOXD12 | 269             | 1799                          | 1400             | 59.14            | 1443                          | 699              | 36.81            | 1405                          | 832                | 31.05            | 832                           | 31.05            | 8323                       | 1702                          | 25.56            |                  |
| HOXD13 | 313             | 1653                          | 612              | 28.14            | 1295                          | 226              | 13.26            | 1092                          | 83                 | 5.78             | 83                            | 5.78             | 2068                       | 454                           | 27.44            |                  |
| HOXD14 | 266             | 331                           | 51               | 11.71            | Singlet only                  | Singlet only     | < 1              | 484                           | 38                 | 5.97             | 38                            | 5.97             | 3561                       | 828                           | 29.06            |                  |



**Table S2:** Genomic representation sequence elements conversed between orthologous *C. milii* and human *HoxA*, *B*, *C* and *D* clusters (*S1*) within the *L. erinacea* genome. The presence or absence of each element is listed. For the elements that were found, the unique contig identifier, length, number of reads that map to the contig, and the average coverage is listed. The presence (Y) and absence (N) of elements in the *L. erinacea HoxA* cluster (GenBank FJ944024) and the *S. canicula HoxA* (GenBank FQ03265), *HoxB* (GenBank FQ032659), and *HoxD* (GenBank FQ032660) clusters are also shown. N/A = not applicable; no coverage found.

Supplemental Table 2

| <i>HoxA</i>   |                                                                         |                              |                       |                     |                                                                        |                                                                           |
|---------------|-------------------------------------------------------------------------|------------------------------|-----------------------|---------------------|------------------------------------------------------------------------|---------------------------------------------------------------------------|
| CSE ID        | <i>C. millii</i> <i>HoxA</i><br>COORDINATES (bp) in<br>GenBank FJ824598 | <i>L. erinacea</i> CONTIG ID | CONTIG<br>LENGTH (bp) | AVERAGE<br>COVERAGE | FOUND IN<br><i>L. erinacea</i><br><i>HoxA</i><br>(GenBank<br>FJ944024) | FOUND IN <i>S.</i><br><i>canicula</i> <i>HoxA</i><br>(GenBank<br>FQ03265) |
| EH-HoxA_CNE1  | 3789-3903                                                               | LER WGS 1 CONTIG 1623245     | 3476                  | 24.8                | N                                                                      | N                                                                         |
| EH-HoxA_CNE2  | 3938-4208                                                               | LER WGS 1 CONTIG 1623245     | 3476                  | 24.8                | N                                                                      | N                                                                         |
| EH-HoxA_CNE3  | 8718-8763                                                               | N/A                          | N/A                   | 0                   | N                                                                      | N                                                                         |
| EH-HoxA_CNE4  | 34105-34232                                                             | LER WGS 1 CONTIG 58188       | 948                   | 22.53               | N                                                                      | N                                                                         |
| EH-HoxA_CNE5  | 35244-35293                                                             | N/A                          | N/A                   | 0                   | N                                                                      | N                                                                         |
| EH-HoxA_CNE6  | 35317-35387                                                             | N/A                          | N/A                   | 0                   | N                                                                      | N                                                                         |
| EH-HoxA_CNE7  | 35398-35705                                                             | LER WGS 1 CONTIG 262779      | 1268                  | 12.13               | N                                                                      | N                                                                         |
| EH-HoxA_CNE8  | 35711-35802                                                             | N/A                          | N/A                   | 0                   | N                                                                      | N                                                                         |
| EH-HoxA_CNE9  | 35860-36014                                                             | LER WGS 1 CONTIG 262779      | 1268                  | 12.13               | N                                                                      | N                                                                         |
| EH-HoxA_CNE10 | 45157-45223                                                             | N/A                          | N/A                   | 0                   | N                                                                      | N                                                                         |
| EH-HoxA_CNE11 | 63289-63368                                                             | N/A                          | N/A                   | 0                   | N                                                                      | N                                                                         |
| EH-HoxA_CNE12 | 64734-64974                                                             | LER WGS 1 CONTIG 713392      | 2827                  | 25.12               | N                                                                      | N                                                                         |
| EH-HoxA_CNE13 | 65942-66057                                                             | N/A                          | N/A                   | 0                   | N                                                                      | N                                                                         |
| EH-HoxA_CNE14 | 66143-66324                                                             | N/A                          | N/A                   | 0                   | N                                                                      | N                                                                         |
| EH-HoxA_CNE15 | 72079-72259                                                             | LER WGS 1 CONTIG 2670831     | 4220                  | 22.6                | N                                                                      | N                                                                         |
| EH-HoxA_CNE16 | 90972-91021                                                             | N/A                          | N/A                   | 0                   | N                                                                      | N                                                                         |
| EH-HoxA_CNE17 | 93833-93881                                                             | N/A                          | N/A                   | 0                   | N                                                                      | N                                                                         |
| EH-HoxA_CNE18 | 109401-109484                                                           | N/A                          | N/A                   | 0                   | N                                                                      | N                                                                         |
| EH-HoxA_CNE19 | 115763-115833                                                           | LER WGS 1 CONTIG 1610348     | 3344                  | 24.67               | Y                                                                      | Y                                                                         |
| EH-HoxA_CNE20 | 121666-121766                                                           | LER WGS 1 CONTIG 35349       | 8650                  | 20.4                | Y                                                                      | Y                                                                         |
| EH-HoxA_CNE21 | 131975-132127                                                           | LER WGS 1 CONTIG 54663       | 7551                  | 21.67               | Y                                                                      | Y                                                                         |
| EH-HoxA_CNE22 | 132800-133000                                                           | LER WGS 1 CONTIG 54663       | 7551                  | 21.67               | Y                                                                      | Y                                                                         |
| EH-HoxA_CNE23 | 136539-136634                                                           | LER WGS 1 CONTIG 54663       | 7551                  | 21.67               | Y                                                                      | Y                                                                         |
| EH-HoxA_CNE24 | 137148-137204                                                           | LER WGS 1 CONTIG 54663       | 7551                  | 21.67               | Y                                                                      | Y                                                                         |
| EH-HoxA_CNE25 | 145442-145559                                                           | LER WGS 1 CONTIG 36067       | 7183                  | 16.43               | Y                                                                      | Y                                                                         |
| EH-HoxA_CNE26 | 146401-146468                                                           | LER WGS 1 CONTIG 69988       | 1440                  | 16.16               | Y                                                                      | Y                                                                         |
| EH-HoxA_CNE27 | 149144-149309                                                           | LER WGS 1 CONTIG 1651197     | 1781                  | 17.79               | Y                                                                      | Y                                                                         |
| EH-HoxA_CNE28 | 153746-153796                                                           | N/A                          | N/A                   | 0                   | N                                                                      | N                                                                         |
| EH-HoxA_CNE29 | 155724-155841                                                           | LER WGS 1 CONTIG 39561       | 7645                  | 20.9                | Y                                                                      | N                                                                         |
| EH-HoxA_CNE30 | 155907-155959                                                           | N/A                          | N/A                   | 0                   | N                                                                      | N                                                                         |
| EH-HoxA_CNE31 | 157784-157860                                                           | N/A                          | N/A                   | 0                   | N                                                                      | N                                                                         |
| EH-HoxA_CNE32 | 157869-157945                                                           | N/A                          | N/A                   | 0                   | N                                                                      | Y                                                                         |
| EH-HoxA_CNE33 | 158465-158514                                                           | N/A                          | N/A                   | 0                   | N                                                                      | N                                                                         |
| EH-HoxA_CNE34 | 158525-158580                                                           | N/A                          | N/A                   | 0                   | N                                                                      | N                                                                         |
| EH-HoxA_CNE35 | 159715-159782                                                           | LER WGS 1 CONTIG 39561       | 7645                  | 20.9                | Y                                                                      | N                                                                         |
| EH-HoxA_CNE36 | 159953-160122                                                           | LER WGS 1 CONTIG 39561       | 7645                  | 20.9                | Y                                                                      | Y                                                                         |
| EH-HoxA_CNE37 | 161878-161935                                                           | N/A                          | N/A                   | 0                   | N                                                                      | N                                                                         |
| EH-HoxA_CNE38 | 165391-165487                                                           | LER WGS 1 CONTIG 1620669     | 4244                  | 22.87               | Y                                                                      | Y                                                                         |
| EH-HoxA_CNE39 | 165992-166087                                                           | LER WGS 1 CONTIG 1620669     | 4244                  | 22.87               | Y                                                                      | Y                                                                         |
| EH-HoxA_CNE40 | 170188-170386                                                           | LER WGS 1 CONTIG 57367       | 3848                  | 17.06               | Y                                                                      | Y                                                                         |
| EH-HoxA_CNE41 | 175586-175801                                                           | LER WGS 1 CONTIG 36107       | 5783                  | 22.29               | Y                                                                      | Y                                                                         |
| EH-HoxA_CNE42 | 178283-178347                                                           | N/A                          | N/A                   | 0                   | N                                                                      | N                                                                         |
| EH-HoxA_CNE43 | 178466-178712                                                           | LER WGS 1 CONTIG 36107       | 5783                  | 22.29               | Y                                                                      | Y                                                                         |
| EH-HoxA_CNE44 | 180092-180205                                                           | N/A                          | N/A                   | 0                   | N                                                                      | N                                                                         |
| EH-HoxA_CNE45 | 180237-180314                                                           | LER WGS 1 CONTIG 2669412     | 4230                  | 23.36               | Y                                                                      | Y                                                                         |
| EH-HoxA_CNE46 | 180337-180413                                                           | LER WGS 1 CONTIG 2669412     | 4230                  | 23.36               | Y                                                                      | Y                                                                         |
| EH-HoxA_CNE47 | 180518-180658                                                           | LER WGS 1 CONTIG 2669412     | 4230                  | 23.36               | Y                                                                      | Y                                                                         |
| EH-HoxA_CNE48 | 180659-180735                                                           | LER WGS 1 CONTIG 2669412     | 4230                  | 23.36               | Y                                                                      | Y                                                                         |
| EH-HoxA_CNE49 | 181418-181760                                                           | LER WGS 1 CONTIG 2669412     | 4230                  | 23.36               | Y                                                                      | Y                                                                         |
| EH-HoxA_CNE50 | 182786-182833                                                           | N/A                          | N/A                   | 0                   | N                                                                      | N                                                                         |
| EH-HoxA_CNE51 | 185772-185847                                                           | N/A                          | N/A                   | 0                   | N                                                                      | N                                                                         |
| EH-HoxA_CNE52 | 186235-186524                                                           | LER WGS 1 CONTIG 37734       | 4962                  | 20.93               | Y                                                                      | Y                                                                         |
| EH-HoxA_CNE53 | 188671-188883                                                           | LER WGS 1 CONTIG 37734       | 4962                  | 20.93               | Y                                                                      | Y                                                                         |
| EH-HoxA_CNE54 | 189397-189466                                                           | N/A                          | N/A                   | 0                   | N                                                                      | N                                                                         |
| EH-HoxA_CNE55 | 191586-191656                                                           | LER WGS 1 CONTIG 37027       | 4271                  | 21.82               | Y                                                                      | Y                                                                         |
| EH-HoxA_CNE56 | 192131-192324                                                           | LER WGS 1 CONTIG 37027       | 4271                  | 21.82               | Y                                                                      | Y                                                                         |
| EH-HoxA_CNE57 | 193576-193624                                                           | N/A                          | N/A                   | 0                   | N                                                                      | N                                                                         |
| EH-HoxA_CNE58 | 194873-195023                                                           | LER WGS 1 CONTIG 37027       | 4271                  | 21.82               | Y                                                                      | Y                                                                         |
| EH-HoxA_CNE59 | 195307-195422                                                           | N/A                          | N/A                   | 0                   | N                                                                      | Y                                                                         |
| EH-HoxA_CNE60 | 196682-196790                                                           | LER WGS 1 CONTIG 33092       | 5789                  | 22.12               | Y                                                                      | Y                                                                         |
| EH-HoxA_CNE61 | 197088-197182                                                           | LER WGS 1 CONTIG 33092       | 5789                  | 22.12               | Y                                                                      | Y                                                                         |
| EH-HoxA_CNE62 | 197229-197286                                                           | LER WGS 1 CONTIG 33092       | 5789                  | 22.12               | Y                                                                      | Y                                                                         |
| EH-HoxA_CNE63 | 201894-201941                                                           | N/A                          | N/A                   | 0                   | N                                                                      | N                                                                         |
| EH-HoxA_CNE64 | 202054-202171                                                           | N/A                          | N/A                   | 0                   | N                                                                      | N                                                                         |
| EH-HoxA_CNE65 | 202554-202702                                                           | LER WGS 1 CONTIG 2704880     | 5703                  | 20.57               | Y                                                                      | Y                                                                         |
| EH-HoxA_CNE66 | 202786-202880                                                           | LER WGS 1 CONTIG 2704880     | 5703                  | 20.57               | Y                                                                      | Y                                                                         |
| EH-HoxA_CNE67 | 205622-205848                                                           | LER WGS 1 CONTIG 2704880     | 5703                  | 20.57               | Y                                                                      | Y                                                                         |
| EH-HoxA_CNE68 | 206385-206438                                                           | LER WGS 1 CONTIG 2704880     | 5703                  | 20.57               | Y                                                                      | Y                                                                         |
| EH-HoxA_CNE69 | 206718-206883                                                           | LER WGS 1 CONTIG 2704880     | 5703                  | 20.57               | Y                                                                      | Y                                                                         |
| EH-HoxA_CNE70 | 208694-208885                                                           | LER WGS 1 CONTIG 55082       | 3522                  | 25.2                | Y                                                                      | Y                                                                         |
| EH-HoxA_CNE71 | 209810-209902                                                           | N/A                          | N/A                   | 0                   | N                                                                      | Y                                                                         |
| EH-HoxA_CNE72 | 209939-210056                                                           | N/A                          | N/A                   | 0                   | N                                                                      | Y                                                                         |
| EH-HoxA_CNE73 | 214124-214190                                                           | N/A                          | N/A                   | 0                   | Y                                                                      | Y                                                                         |
| EH-HoxA_CNE74 | 214271-214426                                                           | LER WGS 1 CONTIG 35378       | 2830                  | 19.85               | Y                                                                      | Y                                                                         |
| EH-HoxA_CNE75 | 217183-217308                                                           | LER WGS 1 CONTIG 62711       | 5627                  | 20.9                | Y                                                                      | Y                                                                         |
| EH-HoxA_CNE76 | 217935-218077                                                           | LER WGS 1 CONTIG 62711       | 5627                  | 20.9                | Y                                                                      | Y                                                                         |
| EH-HoxA_CNE77 | 218203-218444                                                           | LER WGS 1 CONTIG 62711       | 5627                  | 20.9                | Y                                                                      | Y                                                                         |
| EH-HoxA_CNE78 | 219000-219163                                                           | LER WGS 1 CONTIG 62711       | 5627                  | 20.9                | Y                                                                      | Y                                                                         |
| EH-HoxA_CNE79 | 219292-219357                                                           | LER WGS 1 CONTIG 62711       | 5627                  | 20.9                | Y                                                                      | Y                                                                         |
| EH-HoxA_CNE80 | 220367-220454                                                           | N/A                          | N/A                   | 0                   | N                                                                      | N                                                                         |
| EH-HoxA_CNE81 | 221662-221716                                                           | N/A                          | N/A                   | 0                   | N                                                                      | N                                                                         |
| EH-HoxA_CNE82 | 221742-221842                                                           | N/A                          | N/A                   | 0                   | N                                                                      | N                                                                         |
| EH-HoxA_CNE83 | 224375-224488                                                           | N/A                          | N/A                   | 0                   | N                                                                      | N                                                                         |
| EH-HoxA_CNE84 | 224524-224583                                                           | N/A                          | N/A                   | 0                   | N                                                                      | N                                                                         |
| EH-HoxA_CNE85 | 226394-226468                                                           | N/A                          | N/A                   | 0                   | N                                                                      | Y                                                                         |
| EH-HoxA_CNE86 | 226883-226931                                                           | N/A                          | N/A                   | 0                   | N                                                                      | N                                                                         |
| EH-HoxA_CNE87 | 228910-229095                                                           | N/A                          | N/A                   | 0                   | N                                                                      | N                                                                         |
| EH-HoxA_CNE88 | 229212-229314                                                           | LER WGS 1 CONTIG 402806      | 997                   | 21.41               | Y                                                                      | Y                                                                         |
| EH-HoxA_CNE89 | 237432-237486                                                           | N/A                          | N/A                   | 0                   | N                                                                      | N                                                                         |
| EH-HoxA_CNE90 | 246367-246825                                                           | N/A                          | N/A                   | 0                   | N                                                                      | N                                                                         |
| EH-HoxA_CNE91 | 249212-249258                                                           | N/A                          | N/A                   | 0                   | N                                                                      | N                                                                         |
| EH-HoxA_CNE92 | 261040-262088                                                           | N/A                          | N/A                   | 0                   | N                                                                      | N                                                                         |
| EH-HoxA_CNE93 | 262173-262272                                                           | N/A                          | N/A                   | 0                   | N                                                                      | N                                                                         |
| EH-HoxA_CNE94 | 269893-269962                                                           | N/A                          | N/A                   | 0                   | N                                                                      | N                                                                         |
| EH-HoxA_CNE95 | 272230-272386                                                           | LER WGS 1 CONTIG 60616       | 1709                  | 14.71               | N                                                                      | N                                                                         |
| EH-HoxA_CNE96 | 280009-280058                                                           | N/A                          | N/A                   | 0                   | N                                                                      | N                                                                         |

**HoxB**

| CSE ID        | <i>C. millii</i> HoxB<br>COORDINATES (bp) in<br>GenBank FJ824599 | <i>L. erinacea</i> CONTIG ID | CONTIG<br>LENGTH (bp) | AVERAGE<br>COVERAGE | FOUND IN<br><i>S. canicula</i><br>HoxB<br>(GenBank<br>FQ032659) |
|---------------|------------------------------------------------------------------|------------------------------|-----------------------|---------------------|-----------------------------------------------------------------|
| EH-HoxB_CNE1  | 35735-35785                                                      | N/A                          | N/A                   | 0                   | N                                                               |
| EH-HoxB_CNE2  | 49671-49723                                                      | N/A                          | N/A                   | 0                   | N                                                               |
| EH-HoxB_CNE3  | 156398-156447                                                    | N/A                          | N/A                   | 0                   | N                                                               |
| EH-HoxB_CNE4  | 160340-160390                                                    | N/A                          | N/A                   | 0                   | N                                                               |
| EH-HoxB_CNE5  | 181454-181516                                                    | N/A                          | N/A                   | 0                   | N                                                               |
| EH-HoxB_CNE6  | 190077-190158                                                    | N/A                          | N/A                   | 0                   | N                                                               |
| EH-HoxB_CNE7  | 190212-190267                                                    | N/A                          | N/A                   | 0                   | N                                                               |
| EH-HoxB_CNE8  | 190544-190645                                                    | LER WGS 1 CONTIG 1147140     | 954                   | 21.21               | Y                                                               |
| EH-HoxB_CNE9  | 190708-190870                                                    | LER WGS 1 CONTIG 65401       | 1234                  | 17.48               | Y                                                               |
| EH-HoxB_CNE10 | 192593-192646                                                    | N/A                          | N/A                   | 0                   | N                                                               |
| EH-HoxB_CNE11 | 192680-192734                                                    | N/A                          | N/A                   | 0                   | N                                                               |
| EH-HoxB_CNE12 | 193469-193643                                                    | LER WGS 1 CONTIG 80692       | 1262                  | 18.34               | Y                                                               |
| EH-HoxB_CNE13 | 197652-197901                                                    | LER WGS 1 CONTIG 1644194     | 1444                  | 14.48               | Y                                                               |
| EH-HoxB_CNE14 | 202282-202354                                                    | LER WGS 1 CONTIG 40659       | 4828                  | 21.05               | Y                                                               |
| EH-HoxB_CNE15 | 202360-202424                                                    | LER WGS 1 CONTIG 40659       | 4828                  | 21.05               | Y                                                               |
| EH-HoxB_CNE16 | 205908-206137                                                    | LER WGS 1 CONTIG 690334      | 1709                  | 19.92               | Y                                                               |
| EH-HoxB_CNE17 | 208399-208471                                                    | N/A                          | N/A                   | 0                   | N                                                               |
| EH-HoxB_CNE18 | 209190-209432                                                    | LER WGS 1 CONTIG 1630427     | 945                   | 21.5                | Y                                                               |
| EH-HoxB_CNE19 | 213652-213708                                                    | N/A                          | N/A                   | 0                   | N                                                               |
| EH-HoxB_CNE20 | 216967-217047                                                    | LER WGS 1 CONTIG 1641394     | 2611                  | 16.66               | N                                                               |
| EH-HoxB_CNE21 | 217050-217199                                                    | LER WGS 1 CONTIG 2672030     | 4613                  | 21.67               | N                                                               |
| EH-HoxB_CNE22 | 219198-219267                                                    | LER WGS 1 CONTIG 46923       | 4238                  | 19.63               | Y                                                               |
| EH-HoxB_CNE23 | 220073-220157                                                    | LER WGS 1 CONTIG 46923       | 4238                  | 19.63               | Y                                                               |
| EH-HoxB_CNE24 | 220574-220732                                                    | LER WGS 1 CONTIG 46923       | 4238                  | 19.63               | Y                                                               |
| EH-HoxB_CNE25 | 221225-221279                                                    | N/A                          | N/A                   | 0                   | N                                                               |
| EH-HoxB_CNE26 | 221989-222076                                                    | N/A                          | N/A                   | 0                   | N                                                               |
| EH-HoxB_CNE27 | 223237-223366                                                    | N/A                          | N/A                   | 0                   | Y                                                               |
| EH-HoxB_CNE28 | 224065-224209                                                    | N/A                          | N/A                   | 0                   | Y                                                               |
| EH-HoxB_CNE29 | 224602-224694                                                    | LER WGS 1 CONTIG 2711623     | 1650                  | 17.85               | Y                                                               |
| EH-HoxB_CNE30 | 226768-226963                                                    | LER WGS 1 CONTIG 65572       | 1605                  | 16.76               | Y                                                               |
| EH-HoxB_CNE31 | 227053-227142                                                    | N/A                          | N/A                   | 0                   | N                                                               |
| EH-HoxB_CNE32 | 227280-227330                                                    | N/A                          | N/A                   | 0                   | N                                                               |
| EH-HoxB_CNE33 | 227374-227539                                                    | LER WGS 1 CONTIG 65572       | 1605                  | 16.76               | Y                                                               |
| EH-HoxB_CNE34 | 227660-227731                                                    | N/A                          | N/A                   | 0                   | Y                                                               |
| EH-HoxB_CNE35 | 231321-231371                                                    | N/A                          | N/A                   | 0                   | N                                                               |
| EH-HoxB_CNE36 | 233653-233762                                                    | LER WGS 1 CONTIG 2704880     | 5703                  | 20.57               | Y                                                               |
| EH-HoxB_CNE37 | 237771-237939                                                    | LER WGS 1 CONTIG 73733       | 1382                  | 19.76               | Y                                                               |
| EH-HoxB_CNE38 | 240670-240722                                                    | N/A                          | N/A                   | 0                   | N                                                               |
| EH-HoxB_CNE39 | 240781-240828                                                    | N/A                          | N/A                   | 0                   | N                                                               |
| EH-HoxB_CNE40 | 256939-257009                                                    | LER WGS 1 CONTIG 1644638     | 1401                  | 23.53               | N                                                               |
| EH-HoxB_CNE41 | 260429-260541                                                    | LER WGS 1 CONTIG 2666672     | 2777                  | 19.89               | Y                                                               |
| EH-HoxB_CNE42 | 263890-264014                                                    | LER WGS 1 CONTIG 69688       | 1326                  | 16.85               | Y                                                               |
| EH-HoxB_CNE43 | 269862-269906                                                    | N/A                          | N/A                   | 0                   | N                                                               |
| EH-HoxB_CNE44 | 284996-285068                                                    | N/A                          | N/A                   | 0                   | N                                                               |
| EH-HoxB_CNE45 | 296206-296253                                                    | N/A                          | N/A                   | 0                   | N                                                               |
| EH-HoxB_CNE46 | 297114-297213                                                    | N/A                          | N/A                   | 0                   | N                                                               |
| EH-HoxB_CNE47 | 300029-300182                                                    | LER WGS 1 CONTIG 27393       | 269                   | 12.73               | N                                                               |
| EH-HoxB_CNE48 | 334393-334451                                                    | N/A                          | N/A                   | 0                   | N                                                               |

**HoxC**

| CSE ID        | <i>C. millii</i> HoxC<br>COORDINATES (bp) in<br>GenBank FJ824600 | <i>L. erinacea</i> CONTIG ID | CONTIG<br>LENGTH (bp) | AVERAGE<br>COVERAGE |
|---------------|------------------------------------------------------------------|------------------------------|-----------------------|---------------------|
| EH-HoxC_CNE1  | 30953-31010                                                      | N/A                          | N/A                   | 0                   |
| EH-HoxC_CNE2  | 48887-48943                                                      | N/A                          | N/A                   | 0                   |
| EH-HoxC_CNE3  | 97125-97193                                                      | N/A                          | N/A                   | 0                   |
| EH-HoxC_CNE4  | 101967-102016                                                    | N/A                          | N/A                   | 0                   |
| EH-HoxC_CNE5  | 104687-104771                                                    | N/A                          | N/A                   | 0                   |
| EH-HoxC_CNE6  | 114522-114575                                                    | N/A                          | N/A                   | 0                   |
| EH-HoxC_CNE7  | 115490-115542                                                    | N/A                          | N/A                   | 0                   |
| EH-HoxC_CNE8  | 122769-123003                                                    | N/A                          | N/A                   | 0                   |
| EH-HoxC_CNE9  | 123694-123831                                                    | N/A                          | N/A                   | 0                   |
| EH-HoxC_CNE10 | 126451-126507                                                    | N/A                          | N/A                   | 0                   |
| EH-HoxC_CNE11 | 134516-134647                                                    | N/A                          | N/A                   | 0                   |
| EH-HoxC_CNE12 | 134683-134740                                                    | N/A                          | N/A                   | 0                   |
| EH-HoxC_CNE13 | 138991-139158                                                    | N/A                          | N/A                   | 0                   |
| EH-HoxC_CNE14 | 139914-139967                                                    | N/A                          | N/A                   | 0                   |
| EH-HoxC_CNE15 | 145543-145596                                                    | N/A                          | N/A                   | 0                   |
| EH-HoxC_CNE16 | 161707-161892                                                    | N/A                          | N/A                   | 0                   |
| EH-HoxC_CNE17 | 168967-169107                                                    | N/A                          | N/A                   | 0                   |
| EH-HoxC_CNE18 | 176850-177056                                                    | N/A                          | N/A                   | 0                   |
| EH-HoxC_CNE19 | 191470-191670                                                    | N/A                          | N/A                   | 0                   |
| EH-HoxC_CNE20 | 194758-194909                                                    | N/A                          | N/A                   | 0                   |
| EH-HoxC_CNE21 | 195610-195660                                                    | N/A                          | N/A                   | 0                   |
| EH-HoxC_CNE22 | 195671-195737                                                    | N/A                          | N/A                   | 0                   |
| EH-HoxC_CNE23 | 209429-209487                                                    | N/A                          | N/A                   | 0                   |
| EH-HoxC_CNE24 | 213152-213285                                                    | N/A                          | N/A                   | 0                   |
| EH-HoxC_CNE25 | 214945-215002                                                    | N/A                          | N/A                   | 0                   |

**HoxD**

| CSE ID        | <i>C. millii</i> HoxD<br>COORDINATES (bp) in<br>GenBank FJ824601 | <i>L. erinacea</i> CONTIG ID | CONTIG<br>LENGTH (bp) | AVERAGE<br>COVERAGE | FOUND IN<br><i>S. canicula</i><br>HoxD<br>(GenBank<br>FQ032660) |
|---------------|------------------------------------------------------------------|------------------------------|-----------------------|---------------------|-----------------------------------------------------------------|
| EH-HoxD_CNE1  | 6275-6648                                                        | LER WGS 1 CONTIG 47219       | 1820                  | 33.13               | N                                                               |
| EH-HoxD_CNE2  | 6779-7199                                                        | LER WGS 1 CONTIG 47219       | 1820                  | 33.13               | N                                                               |
| EH-HoxD_CNE3  | 10510-10579                                                      | N/A                          | N/A                   | 0                   | N                                                               |
| EH-HoxD_CNE4  | 10794-12148                                                      | LER WGS 1 CONTIG 59346       | 1137                  | 18.36               | N                                                               |
| EH-HoxD_CNE5  | 14933-14981                                                      | N/A                          | N/A                   | 0                   | N                                                               |
| EH-HoxD_CNE6  | 15893-16191                                                      | LER WGS 1 CONTIG 1028740     | 1594                  | 25.95               | N                                                               |
| EH-HoxD_CNE7  | 16320-16738                                                      | LER WGS 1 CONTIG 1028740     | 1594                  | 25.95               | N                                                               |
| EH-HoxD_CNE8  | 16882-17035                                                      | LER WGS 1 CONTIG 1028740     | 1594                  | 25.95               | N                                                               |
| EH-HoxD_CNE9  | 26375-26424                                                      | N/A                          | N/A                   | 0                   | N                                                               |
| EH-HoxD_CNE10 | 26601-26837                                                      | LER WGS 1 CONTIG 209778      | 1602                  | 20.67               | N                                                               |
| EH-HoxD_CNE11 | 30541-30659                                                      | LER WGS 1 CONTIG 1633014     | 1322                  | 24.25               | N                                                               |
| EH-HoxD_CNE12 | 33977-34025                                                      | N/A                          | N/A                   | 0                   | N                                                               |
| EH-HoxD_CNE13 | 42667-43130                                                      | LER WGS 1 CONTIG 642692      | 3072                  | 23.61               | N                                                               |

|                |               |                          |      |       |   |
|----------------|---------------|--------------------------|------|-------|---|
| EH-HoxD_CNE14  | 43219-43455   | LER WGS 1 CONTIG 642692  | 3072 | 23.61 | N |
| EH-HoxD_CNE15  | 46629-46981   | LER WGS 1 CONTIG 65194   | 914  | 27.5  | N |
| EH-HoxD_CNE16  | 50816-50865   | N/A                      | N/A  | 0     | N |
| EH-HoxD_CNE17  | 51032-51078   | N/A                      | N/A  | 0     | N |
| EH-HoxD_CNE18  | 51379-51586   | N/A                      | N/A  | 0     | N |
| EH-HoxD_CNE19  | 52504-52551   | N/A                      | N/A  | 0     | N |
| EH-HoxD_CNE20  | 55044-55102   | N/A                      | N/A  | 0     | N |
| EH-HoxD_CNE21  | 57941-58103   | LER WGS 1 CONTIG 1597922 | 4490 | 28.44 | N |
| EH-HoxD_CNE22  | 58592-59012   | LER WGS 1 CONTIG 1597922 | 4490 | 28.44 | N |
| EH-HoxD_CNE23  | 63146-63205   | N/A                      | N/A  | 0     | N |
| EH-HoxD_CNE24  | 66012-66056   | N/A                      | N/A  | 0     | N |
| EH-HoxD_CNE25  | 70244-70297   | N/A                      | N/A  | 0     | N |
| EH-HoxD_CNE26  | 80102-80467   | LER WGS 1 CONTIG 79769   | 1895 | 23.15 | N |
| EH-HoxD_CNE27  | 80947-81145   | LER WGS 1 CONTIG 79769   | 1895 | 23.15 | N |
| EH-HoxD_CNE28  | 88503-89096   | LER WGS 1 CONTIG 70875   | 1822 | 19.33 | N |
| EH-HoxD_CNE29  | 89174-89642   | LER WGS 1 CONTIG 2671970 | 1716 | 29.53 | N |
| EH-HoxD_CNE30  | 89773-89826   | N/A                      | N/A  | 0     | N |
| EH-HoxD_CNE31  | 90170-90333   | LER WGS 1 CONTIG 2671970 | 1716 | 29.53 | N |
| EH-HoxD_CNE32  | 104547-104596 | N/A                      | N/A  | 0     | N |
| EH-HoxD_CNE33  | 106717-107570 | LER WGS 1 CONTIG 1640383 | 1712 | 20.88 | N |
| EH-HoxD_CNE34  | 107596-107650 | N/A                      | N/A  | 0     | N |
| EH-HoxD_CNE35  | 110021-110224 | LER WGS 1 CONTIG 690815  | 1583 | 12.3  | N |
| EH-HoxD_CNE36  | 113868-113944 | N/A                      | N/A  | 0     | N |
| EH-HoxD_CNE37  | 114062-114152 | N/A                      | N/A  | 0     | N |
| EH-HoxD_CNE38  | 124175-124313 | LER WGS 1 CONTIG 653839  | 4125 | 21.78 | N |
| EH-HoxD_CNE39  | 124618-124680 | N/A                      | N/A  | 0     | N |
| EH-HoxD_CNE40  | 124749-124820 | N/A                      | N/A  | 0     | N |
| EH-HoxD_CNE41  | 125433-125484 | N/A                      | N/A  | 0     | N |
| EH-HoxD_CNE42  | 128694-129070 | LER WGS 1 CONTIG 86891   | 975  | 14.89 | N |
| EH-HoxD_CNE43  | 149246-149742 | LER WGS 1 CONTIG 1614443 | 6851 | 20.65 | Y |
| EH-HoxD_CNE44  | 149998-150558 | LER WGS 1 CONTIG 1614443 | 6851 | 20.65 | Y |
| EH-HoxD_CNE45  | 150587-150801 | LER WGS 1 CONTIG 1614443 | 6851 | 20.65 | Y |
| EH-HoxD_CNE46  | 150825-151115 | LER WGS 1 CONTIG 1614443 | 6851 | 20.65 | Y |
| EH-HoxD_CNE47  | 151801-151948 | LER WGS 1 CONTIG 1614443 | 6851 | 20.65 | Y |
| EH-HoxD_CNE48  | 152712-153315 | LER WGS 1 CONTIG 1614443 | 6851 | 20.65 | Y |
| EH-HoxD_CNE49  | 156657-156740 | N/A                      | N/A  | 0     | Y |
| EH-HoxD_CNE50  | 158212-158436 | LER WGS 1 CONTIG 35761   | 4347 | 22.34 | Y |
| EH-HoxD_CNE51  | 158467-158600 | LER WGS 1 CONTIG 35761   | 4347 | 22.34 | Y |
| EH-HoxD_CNE52  | 176042-176090 | N/A                      | N/A  | 0     | N |
| EH-HoxD_CNE53  | 184726-184813 | LER WGS 1 CONTIG 45979   | 8323 | 22.75 | Y |
| EH-HoxD_CNE54  | 187625-187702 | N/A                      | N/A  | 0     | N |
| EH-HoxD_CNE55  | 188475-188580 | N/A                      | N/A  | 0     | N |
| EH-HoxD_CNE56  | 190523-190613 | N/A                      | N/A  | 0     | N |
| EH-HoxD_CNE57  | 190911-190996 | N/A                      | N/A  | 0     | Y |
| EH-HoxD_CNE58  | 197246-197342 | N/A                      | N/A  | 0     | N |
| EH-HoxD_CNE59  | 197353-197431 | N/A                      | N/A  | 0     | N |
| EH-HoxD_CNE60  | 198205-198381 | N/A                      | N/A  | 0     | N |
| EH-HoxD_CNE61  | 204979-205063 | N/A                      | N/A  | 0     | N |
| EH-HoxD_CNE62  | 205709-205791 | N/A                      | N/A  | 0     | N |
| EH-HoxD_CNE63  | 206425-206532 | LER WGS 1 CONTIG 75394   | 2314 | 23.37 | N |
| EH-HoxD_CNE64  | 209283-209352 | N/A                      | N/A  | 0     | N |
| EH-HoxD_CNE65  | 209380-209447 | N/A                      | N/A  | 0     | N |
| EH-HoxD_CNE66  | 212739-212828 | N/A                      | N/A  | 0     | N |
| EH-HoxD_CNE67  | 215427-215503 | LER WGS 1 CONTIG 1618096 | 4177 | 21.42 | Y |
| EH-HoxD_CNE68  | 218975-219097 | LER WGS 1 CONTIG 65489   | 2323 | 21.43 | Y |
| EH-HoxD_CNE69  | 219106-219178 | N/A                      | N/A  | 0     | N |
| EH-HoxD_CNE70  | 224102-224151 | N/A                      | N/A  | 0     | N |
| EH-HoxD_CNE71  | 227740-227916 | LER WGS 1 CONTIG 57213   | 3255 | 23.52 | Y |
| EH-HoxD_CNE72  | 231818-231985 | LER WGS 1 CONTIG 2672030 | 4613 | 21.67 | Y |
| EH-HoxD_CNE73  | 232681-232748 | N/A                      | N/A  | 0     | N |
| EH-HoxD_CNE74  | 233725-233775 | N/A                      | N/A  | 0     | N |
| EH-HoxD_CNE75  | 235032-235164 | LER WGS 1 CONTIG 2672030 | 4613 | 21.67 | Y |
| EH-HoxD_CNE76  | 235754-235807 | LER WGS 1 CONTIG 56573   | 3681 | 24.87 | Y |
| EH-HoxD_CNE77  | 238639-238981 | LER WGS 1 CONTIG 56573   | 3681 | 24.87 | Y |
| EH-HoxD_CNE78  | 241070-241219 | LER WGS 1 CONTIG 1171989 | 1371 | 19.71 | Y |
| EH-HoxD_CNE79  | 241331-241413 | LER WGS 1 CONTIG 1171989 | 1371 | 19.71 | Y |
| EH-HoxD_CNE80  | 241608-241669 | LER WGS 1 CONTIG 1171989 | 1371 | 19.71 | Y |
| EH-HoxD_CNE81  | 242635-242712 | LER WGS 1 CONTIG 34637   | 2167 | 19.88 | Y |
| EH-HoxD_CNE82  | 242907-243046 | N/A                      | N/A  | 0     | N |
| EH-HoxD_CNE83  | 244576-244692 | N/A                      | N/A  | 0     | Y |
| EH-HoxD_CNE84  | 244853-244980 | LER WGS 1 CONTIG 2689503 | 1723 | 23.47 | Y |
| EH-HoxD_CNE85  | 245026-245118 | N/A                      | N/A  | 0     | N |
| EH-HoxD_CNE86  | 246273-246443 | LER WGS 1 CONTIG 1623373 | 1497 | 22.09 | Y |
| EH-HoxD_CNE87  | 247193-247267 | N/A                      | N/A  | 0     | Y |
| EH-HoxD_CNE88  | 250419-250500 | N/A                      | N/A  | 0     | N |
| EH-HoxD_CNE89  | 250514-250632 | N/A                      | N/A  | 0     | Y |
| EH-HoxD_CNE90  | 251218-251337 | LER WGS 1 CONTIG 79523   | 832  | 17.16 | Y |
| EH-HoxD_CNE91  | 256792-256927 | N/A                      | N/A  | 0     | Y |
| EH-HoxD_CNE92  | 256956-257086 | LER WGS 1 CONTIG 42923   | 2851 | 23.4  | Y |
| EH-HoxD_CNE93  | 264147-264259 | LER WGS 1 CONTIG 2679883 | 1426 | 22.08 | Y |
| EH-HoxD_CNE94  | 268069-268124 | N/A                      | N/A  | 0     | N |
| EH-HoxD_CNE95  | 271794-271846 | N/A                      | N/A  | 0     | N |
| EH-HoxD_CNE96  | 295972-296071 | N/A                      | N/A  | 0     | N |
| EH-HoxD_CNE97  | 296137-296443 | LER WGS 1 CONTIG 51285   | 1880 | 16.6  | N |
| EH-HoxD_CNE98  | 299405-299670 | N/A                      | N/A  | 0     | N |
| EH-HoxD_CNE99  | 303709-303909 | LER WGS 1 CONTIG 1617891 | 2974 | 19.1  | N |
| EH-HoxD_CNE100 | 309969-310108 | N/A                      | N/A  | 0     | N |
| EH-HoxD_CNE101 | 313224-313613 | LER WGS 1 CONTIG 41109   | 2077 | 26.98 | N |
| EH-HoxD_CNE102 | 313806-314055 | LER WGS 1 CONTIG 41109   | 2077 | 26.98 | N |
| EH-HoxD_CNE103 | 314075-314283 | N/A                      | N/A  | 0     | N |
| EH-HoxD_CNE104 | 317278-317324 | N/A                      | N/A  | 0     | N |
| EH-HoxD_CNE105 | 321086-321252 | LER WGS 1 CONTIG 1617352 | 4761 | 28.84 | N |
